# Supplementary material
Source: HighWire-hosted journal article supplement (https://www.annfammed.org/highwire/filestream/8519/field_highwire_adjunct_files/5/Goldman_Supp_App_14.pdf)
Supplement: Goldman_Supp_App_14.pdf [file Goldman_Supp_App_14.pdf]

**Goldman R, Parker DR, Brown J, Walker J, Eaton CB, Borkan JM. Recommendations for a Mixed Methods Approach for Evaluating the Patient-Centered Medical Home. *Ann Fam Med*. 2015;13(2):.**

**Supplemental Appendix 14. Brown Process Evaluation Focus Group Questions**

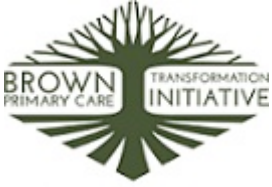

## **Brown Primary Care Transformation Initiative**

### **Process Evaluation with Data Collection Staff**

### **Core Question Guide**

#### **CONDUCTING EVALUATION DATA COLLECTION:**

1. Which sites have you been involved with for evaluation? We'll discuss your reflections about each site separately. Which site would you like to start with?
2. What is your overall assessment about how the evaluation procedures went at Site X? What makes you say this?
3. Let's consider the quantitative surveys first.
  - a. How did you recruit people for surveys? (each role/type) Barriers/Facilitators. Who was involved in helping you with recruitment?
  - b. What were some barriers to smooth completion of the sets of surveys?
  - c. Which surveys were more difficult to get completed? Why do you think this is so?
  - d. Which staff roles or types of patients were more difficult to complete the surveys with? Why do you think this was so?
  - e. When survey administration went well, what do you think facilitated this?
4. Now let's consider the qualitative observations, interviews, pathways
  - a. What do you think about the participant observation that you conducted at the site? Where did you situate yourself? Was it fruitful time spent? Why/why not?
  - b. How did you recruit people for interviews and pathways? Barriers/Facilitators. Who was involved in helping you with recruitment?
  - c. What were some barriers to smooth completion of the interviews and pathways? Which were more difficult to get completed? Why do you think this is so?
  - d. Which staff roles or types of patients were more difficult to interview or conduct pathways with? Why do you think this was so?
  - e. When interviews and pathways went well, what do you think facilitated this?

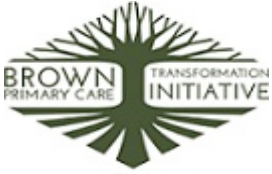

## **Brown Primary Care Transformation Initiative**

### **Process Evaluation with Transformation Facilitation Staff**

### **Core Question Guide**

#### **PROVIDING TRANSFORMATION FACILITATION**

1. At this point, how would you describe the role of transformation facilitator?
  - a. How has this changed over your time working as a facilitator? Why do you think this is so?
2. How have you learned how to be a transformation facilitator?
3. Which sites have you been involved with for transformation? Which site would you like to start with?
4. How would you say transformation is going at this site? What makes you say this?
5. In what ways has your assessment of how transformation is going changed since we last had a process evaluation discussion about this?
6. What has been the general attitude of the practice providers and staff toward transformation work?
  - a. What is their demeanor when you are working with them on transformation initiatives?
  - b. Which providers or staff members seem to be most engaged? Why do you think this is so?
  - c. Which providers or staff members seem little engaged? Why do you think this is so?
  - d. How do you think this has affected transformation progress at this site?
7. What are some barriers to transformation progress?
8. What are some facilitators?
9. What has surprised you? (positive and negative)
10. Have there been any events at this practice or that affect this practice that may have had an effect (positive or negative) on transformation success at this practice?
11. What is the progress of any change initiatives that were underway at the time of our last focus group?
12. What change initiatives has the practice begun since our last process focus group? How are they going?
13. Describe an example of a transformation initiative that the site is having some success with.
  - a. What/who particularly has helped with this success?
14. Describe an example of a transformation initiative that the site is having difficulty with.
  - a. What/who is getting in the way of progress?
15. What are some problems that you have helped the site solve? How did this happen? How do you feel about your role in this problem resolution?
16. How do you feel overall about your role in practice transformation with this site?
17. What are some things that you think you did particularly well?
18. What are some things that you realize might have been better done differently?
19. What are some strategies that you think might be helpful to implement going forward?
20. What insights about transformation have you gained from working with this practice?
21. What resources (of any type) did you access to help your transformation work with this practice?
22. Are there other resources (of any type) that you think would have been useful to have had access to while working with the practice in the last 4 months?
